# Supplementary material
Source: publisher figshare collection journal article supplement (https://frontiersin.figshare.com/ndownloader/files/28706970)
Supplement: Supplementary file 1 [file 28706970]

**Table S1**. Presence of T6SS in strains authorized in Brazil for the production of inoculants (Instrução Normativa SDA/MAPA 13/2011)1

| **Legume** | **SEMIA** | **Genus/Species** | **Original designation** | **Presence of T6SS2** |
| --- | --- | --- | --- | --- |
| *Arachis hypogaea* | 6144 | *Bradyrhizobium sp.*   |  | | --- | | Rhodesia 411 | Unknown |
| *Cicer arietinum* | 396 | *Mesorhizobium ciceri* | TAL 1148 | Unknown |
| *Glycine max* | 5079 | *Bradyrhizobium japonicum* | CPAC 15 | Yes |
| 5080 | *Bradyrhizobium diazoefficiens* | CPAC 7 | Yes |
| 587 | *Bradyrhizobium elkanii* | SEMIA 587 | Yes |
| 5019 | *Bradyrhizobium e lkanii* | 29W | Yes |
| *Lens culinaris* | 344 | *Rhizobium leguminosarum bv viciae* | SEMIA 344 | Unknown |
| 3025 | *Rhizobium leguminosarum bv viciae* | CPAL 3 | Unknown |
| 3026 | *Rhizobium leguminosarum bv viciae* | CPAL 12 | Unknown |
| *Phaseolus vulgaris* | 4077 | *Rhizobium tropici* | CIAT899 | No |
| 4080 | *Rhizobium tropici* | PRF81 | No |
| 4088 | *Rhizobium leguminosarum bv viciae* | H12 | No |
| *Pisum sativum* | 3007 | *Mesorhizobium sp.* | B11 | Yes |
| 3033 | *Rhizobium leguminosarum bv viciae* | EEL 7082 | Unknown |
| *Vigna unguiculata* | 6461 | *Bradyrhizobium sp.* | UFLA 3-84 | Unknown |
| 6462 | *Bradyrhizobium sp.* | BR3267 | No |
| 6463 | *Bradyrhizobium sp.* | INPA3-11 | Unknown |
| 6464 | *Bradyrhizobium sp.* | BR3262 | Unknown |

1:.Available online at: https://www.normasbrasil.com.br/norma/instrucao-normativa-13-2011_78540.html (accessed January 15, 2020).

2:Unknown means that there is no genomic sequence available.
